# Supplementary material
Source: PubMed Central journal article supplement (PMC1356527)
Supplement: nar_34_2_686__1.pdf [file nar_34_2_686__1.pdf]

## **Supplementary Material**

**Similarities and differences in interaction of K<sup>+</sup> and Na<sup>+</sup> with condensed ordered DNA. A molecular dynamics simulation study.**

Yuhua Cheng, Nikolay Korolev and Lars Nordenskiöld

**Table 1S.** General properties of the simulated systems.

| System                | Cell dimension,<br>Å | Density,<br>g/cm <sup>3</sup> | Box volume,<br>nm <sup>3</sup> | Species<br>concentration, M                                                      | Diffusion<br>parameters: $D \cdot 10^{10}$ ,<br>m <sup>2</sup> /s ( $\langle R \rangle$ , Å)* |
|-----------------------|----------------------|-------------------------------|--------------------------------|----------------------------------------------------------------------------------|-----------------------------------------------------------------------------------------------|
| K/20                  | 43.4×37.6×33.0       | 1.318                         | 53.85                          | 37.52 (H <sub>2</sub> O)<br>2.001 (K <sup>+</sup> )<br>0.125 (Cl <sup>-</sup> )  | 7.0 (20.6) H <sub>2</sub> O<br>3.52 (14.6) K <sup>+</sup><br>3.0 (13.5) Cl <sup>-</sup>       |
| K/15                  | 39.5×34.2×33.2       | 1.375                         | 44.7                           | 33.21 (H <sub>2</sub> O)<br>2.214 (K <sup>+</sup> )                              | 4.35 (16.2) H <sub>2</sub> O<br>1.76 (10.3) K <sup>+</sup>                                    |
| Na/20                 | 42.8×37.1×32.9       | 1.326                         | 52.2                           | 38.39 (H <sub>2</sub> O)<br>2.048 (Na <sup>+</sup> )<br>0.128 (Cl <sup>-</sup> ) | 5.5 (18.2) H <sub>2</sub> O<br>1.33 (8.9) Na <sup>+</sup><br>3.22 (10.3) Cl <sup>-</sup>      |
| Na/15                 | 39.1×33.8×32.8       | 1.382                         | 43.9                           | 34.82 (H <sub>2</sub> O)<br>2.321 (Na <sup>+</sup> )                             | 2.82 (13.0) H <sub>2</sub> O<br>0.58 (5.93) Na <sup>+</sup>                                   |
| K/20-22 <sup>¶</sup>  | 45.9×39.8×29.4       | 1.320                         | 53.72                          | 37.11 (H <sub>2</sub> O)<br>1.979 (K <sup>+</sup> )<br>0.124 (Cl <sup>-</sup> )  | 6.9 (20.4) H <sub>2</sub> O<br>3.30 (14.1) K <sup>+</sup><br>3.08 (13.6) Cl <sup>-</sup>      |
| K/15-22 <sup>¶</sup>  | 43.3×37.5×27.7       | 1.371                         | 44.8                           | 33.30 (H <sub>2</sub> O)<br>2.220 (K <sup>+</sup> )                              | 4.30 (16.1) H <sub>2</sub> O<br>1.90 (10.7) K <sup>+</sup>                                    |
| Na/20-22 <sup>¶</sup> | 44.2×38.3×30.8<br>5  | 1.328                         | 51.9                           | 38.40 (H <sub>2</sub> O)<br>2.045 (Na <sup>+</sup> )<br>0.128 (Cl <sup>-</sup> ) | 4.75 (17.0) H <sub>2</sub> O<br>1.40 (9.2) Na <sup>+</sup><br>2.05 (11.2) Cl <sup>-</sup>     |
| Na/15-22 <sup>¶</sup> | 43.3×34.3×32.0       | 1.380                         | 43.3                           | 34.55 (H <sub>2</sub> O)<br>2.303 (Na <sup>+</sup> )                             | 2.85 (13.1) H <sub>2</sub> O<br>0.56 (5.8) Na <sup>+</sup>                                    |

\*  $D$  is diffusion coefficient;  $\langle R \rangle$  is root mean square displacement calculated for 1 ns. <sup>¶</sup> 10 ns MD simulations with CHARMM22 force field, other conditions are similar to these of corresponding system simulated with the use of the CHARMM27 force field.

## Experimental and MD simulation data for comparison

### I. Low water content

1. Ref. (1); Experimental data on Na-DNA oriented fibers, NMR relaxation method: 85% relative humidity (RH), 13 H<sub>2</sub>O/nucleotide,  $D_{\text{wat}}=2.1 \cdot 10^{-10}$  m<sup>2</sup>/s; 95% RH, 22 H<sub>2</sub>O/nucleotide,  $D_{\text{wat}}=5.3 \cdot 10^{-10}$  m<sup>2</sup>/s.
2. Ref. (1); MD simulation data; CHARMM22 force field, water model SPC, Ref. (2). Na<sup>+</sup>, model Ref. (3), 15 H<sub>2</sub>O/phosphate:  $D_{\text{Na}}=0.55 \cdot 10^{-10}$  m<sup>2</sup>/s,  $D_{\text{wat}}=2.5 \cdot 10^{-10}$  m<sup>2</sup>/s; 20 H<sub>2</sub>O/phosphate:  $D_{\text{Na}}=1.3 \cdot 10^{-10}$  m<sup>2</sup>/s,  $D_{\text{wat}}=4.6 \cdot 10^{-10}$  m<sup>2</sup>/s.

### II. Water solutions.

3. Ref. (4); experimental data for simple salt solution at infinite dilution,:  $D_{\text{Na}}=13.3 \cdot 10^{-10}$  m<sup>2</sup>/s;  $D_{\text{K}}=19.6 \cdot 10^{-10}$  m<sup>2</sup>/s;  $D_{\text{wat}}=23 \cdot 10^{-10}$  m<sup>2</sup>/s.
4. Ref. (5); MD simulations of water: water model, SPC, Ref. (2),  $D_{\text{wat}}=(42.0 \pm 0.8) \cdot 10^{-10}$  m<sup>2</sup>/s; water model SPC/E, Ref. (6),  $D_{\text{wat}}=(27-28) \cdot 10^{-10}$  m<sup>2</sup>/s; water model TIP3P original Ref. (7),  $D_{\text{wat}}=(54-56) \cdot 10^{-10}$  m<sup>2</sup>/s; water model TIP3P modified Ref. (8),  $D_{\text{wat}}=(59.0 \pm 0.8) \cdot 10^{-10}$  m<sup>2</sup>/s.
5. Ref. (9); MD simulation data for simple salt solution at infinite dilution (water model, SPC/E, Ref. (6), Na<sup>+</sup>, K<sup>+</sup>, Ref. (3)):  $D_{\text{Na}}=(12.8 \pm 0.5) \cdot 10^{-10}$  m<sup>2</sup>/s;  $D_{\text{K}}=(18.3 \pm 1.3) \cdot 10^{-10}$  m<sup>2</sup>/s.
6. Ref. (10), MD simulation of the DNA solution, (227 H<sub>2</sub>O/DNA phosphate; Amber, parm99; water model, TIP3P; Na<sup>+</sup> and K<sup>+</sup> models, Ref. (11)):  $D_{\text{Na}}=17 \cdot 10^{-10}$  m<sup>2</sup>/s,  $D_{\text{K}}=28 \cdot 10^{-10}$  m<sup>2</sup>/s.
7. Ref. (12), MD simulation of the DNA solution, (180 H<sub>2</sub>O/DNA phosphate; Amber, parm94, water model TIP3P; Na<sup>+</sup>, Ref. (11)):  $D_{\text{Na}} \sim 10 \cdot 10^{-10}$  m<sup>2</sup>/s.

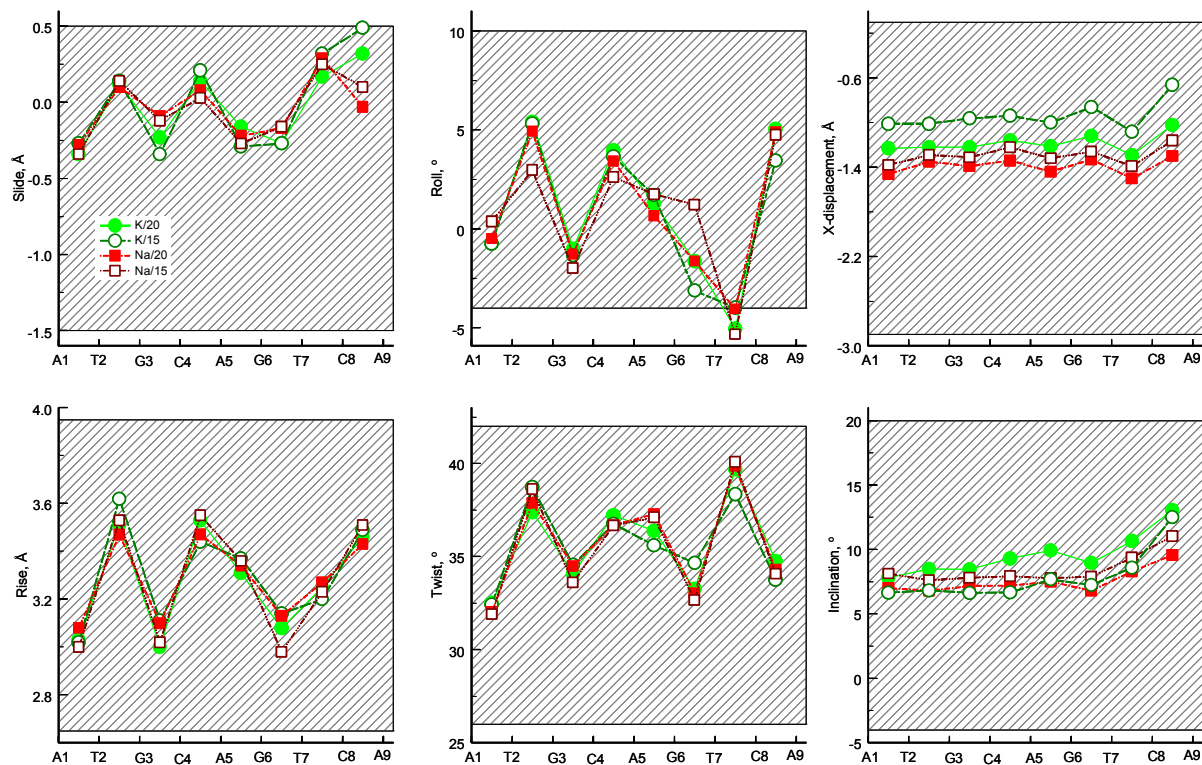

**Figure 1S.** Structural parameters (slide, roll, x-displacement, rise, twist, and inclination) of DNA base pair steps calculated by Curve5.2 (13) from averaged (over 20 ns and 3 decamers in the simulation cell) DNA structures of the four systems studied in the present work. The graphs show variation of the parameters in dependence of the DNA sequence. Shaded area shows regions typical for the B-DNA family found from analysis of X-ray crystallography data. The values of these six parameters are grouped in pairs (slide/rise, roll/twist, x-displacement/inclination) and displayed in Fig. 1 of the main text.

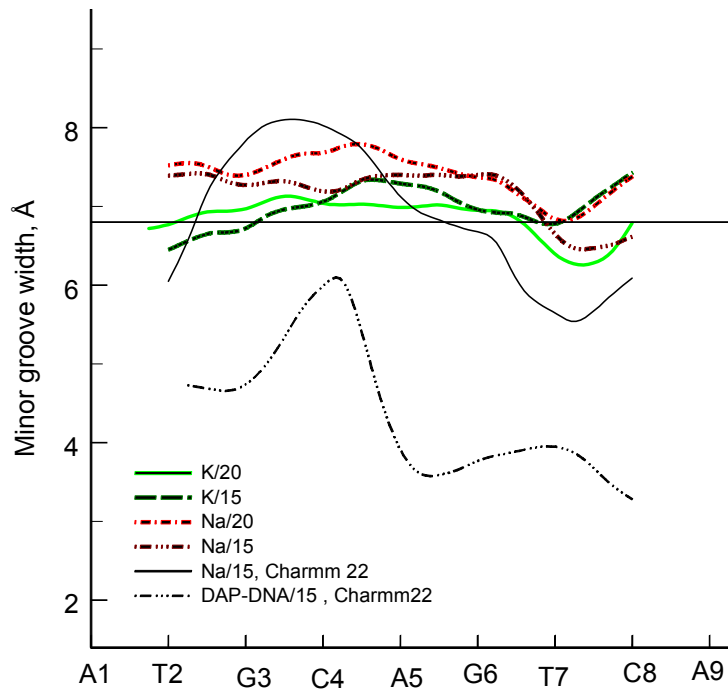

**Figure 2S.** Average minor groove width of the DNA sequence ( $x$ -axis) studied in the present work. For comparison, data is given from our earlier work (14) using Charmm22 force field calculated from a 6 ns simulation for the same DNA sequence and 15 H<sub>2</sub>O/nucleotide with Na<sup>+</sup> (thin black line) and the synthetic polyamine (diaminopropane<sup>2+</sup>, DAP, thin dot-dashed black line) as the DNA counterions. The DAP-DNA system shows an example of strong influence of the ligand binding on the DNA structure. **Horizontal bar shows the value of the minor groove width of the “ideal” B-DNA.**

**Table 2S.** Averaged occupancies and residence times (in ps) for water (Ow) and K<sup>+</sup>/Na<sup>+</sup>. Numbers separated by slash are average and longest residence time respectively.

| DNA site         |           | Ow        |           |           |           | K <sup>+</sup> or Na <sup>+</sup> |           |            |           |
|------------------|-----------|-----------|-----------|-----------|-----------|-----------------------------------|-----------|------------|-----------|
|                  |           | K/15      | K/20      | Na/15     | Na/20     | K/15                              | K/20      | Na/15      | Na/20     |
| Phosphate oxygen |           |           |           |           |           |                                   |           |            |           |
| O1P              | Occupancy | 2.59      | 2.82      | 2.61      | 2.68      | 0.24                              | 0.17      | 0.35       | 0.22      |
|                  | Res. time | 6.99/1278 | 5.56/1188 | 6.00/2520 | 5.95/2028 | 7.84/1566                         | 5.88/510  | 58.3/11880 | 41.4/4752 |
| O2P              | Occupancy | 2.67      | 2.65      | 2.58      | 2.75      | 0.14                              | 0.09      | 0.14       | 0.08      |
|                  | Res. time | 7.54/1158 | 7.29/876  | 8.48/1482 | 7.35/1020 | 5.77/684                          | 5.02/414  | 24.3/3744  | 18.8/1506 |
| O3*              | Occupancy | 1.05      | 1.06      | 1.18      | 1.15      | 0.08                              | 0.06      | 0.04       | 0.02      |
|                  | Res. time | 3.36/648  | 3.09/372  | 3.99/1878 | 3.58/744  | 5.45/702                          | 4.73/288  | 5.62/1392  | 3.58/894  |
| O5*              | Occupancy | 0.29      | 0.32      | 0.38      | 0.36      | 0.03                              | 0.02      | 0.01       | 0.01      |
|                  | Res. time | 2.05/342  | 1.58/288  | 2.08/3612 | 1.81/732  | 3.55/678                          | 3.54/2682 | 1.78/270   | 3.57/2328 |
| Sugar            |           |           |           |           |           |                                   |           |            |           |
| O4*              | Occupancy | 1.00      | 1.14      | 1.32      | 1.19      | 0.24                              | 0.17      | 0.05       | 0.05      |
|                  | Res. time | 4.90/1404 | 4.64/888  | 5.76/5628 | 5.63/2742 | 14.0/3702                         | 13.1/1722 | 16.2/7240  | 17.9/2328 |
| Minor groove     |           |           |           |           |           |                                   |           |            |           |
| TO2              | Occupancy | 0.87      | 1.05      | 1.54      | 1.61      | 0.47                              | 0.31      | 0.10       | 0.14      |
|                  | Res. time | 3.49/1098 | 3.74/498  | 5.23/2046 | 5.14/1518 | 16.5/2532                         | 15.2/1278 | 28.0/2868  | 27.9/2484 |
| CO2              | Occupancy | 1.09      | 1.11      | 1.22      | 1.22      | 0.21                              | 0.16      | 0.04       | 0.04      |
|                  | Res. time | 5.57/714  | 5.00/1380 | 6.41/4734 | 6.44/1938 | 8.78/2004                         | 8.56/1440 | 9.60/768   | 9.86/990  |
| AN3              | Occupancy | 0.89      | 0.94      | 1.08      | 1.08      | 0.30                              | 0.20      | 0.03       | 0.05      |
|                  | Res. time | 5.05/834  | 6.11/672  | 9.27/5196 | 8.23/3396 | 32.8/4194                         | 25.5/1884 | 10.0/696   | 23.6/1896 |
| GN3              | Occupancy | 1.04      | 1.07      | 1.13      | 1.15      | 0.15                              | 0.12      | 0.03       | 0.03      |
|                  | Res. time | 6.91/858  | 6.89/1188 | 7.75/2994 | 7.94/1500 | 12.07/1770                        | 7.82/774  | 27.1/2160  | 13.9/1356 |

Continuation of Table 2S

| DNA site                                  | Ow        |           |           |           | K <sup>+</sup> or Na <sup>+</sup> |            |            |           |           |
|-------------------------------------------|-----------|-----------|-----------|-----------|-----------------------------------|------------|------------|-----------|-----------|
|                                           | K/15      | K/20      | Na/15     | Na/20     | K/15                              | K/20       | Na/15      | Na/20     |           |
| Major groove                              |           |           |           |           |                                   |            |            |           |           |
| AN7                                       | Occupancy | 0.95      | 0.95      | 1.09      | 1.09                              | 0.22       | 0.19       | 0.09      | 0.09      |
|                                           | Res. time | 5.28/438  | 5.46/438  | 5.29/852  | 5.12/618                          | 22.5/2700  | 16.8/1080  | 38.3/2406 | 44.6/1452 |
| GN7                                       | Occupancy | 0.98      | 1.11      | 1.27      | 1.31                              | 0.28       | 0.26       | 0.05      | 0.06      |
|                                           | Res. time | 4.02/696  | 3.67/444  | 4.72/840  | 4.61/576                          | 23.5/1038  | 25.1/1398  | 22.1/708  | 19.5/1020 |
| GO6                                       | Occupancy | 0.95      | 0.95      | 1.40      | 1.43                              | 0.30       | 0.27       | 0.05      | 0.05      |
|                                           | Res. time | 3.97/252  | 3.95/270  | 5.49/948  | 5.46/1278                         | 32.65/2946 | 32.75/2856 | 16.0/654  | 12.0/588  |
| TO4                                       | Occupancy | 1.05      | 1.00      | 1.38      | 1.26                              | 0.14       | 0.17       | 0.01      | 0.01      |
|                                           | Res. time | 3.76/228  | 3.73/240  | 4.31/612  | 4.24/582                          | 8.44/996   | 9.15/1110  | 5.15/174  | 5.87/258  |
| K <sup>+</sup> /Na <sup>+</sup> Occupancy |           | 7.28      | 7.56      | 5.295     | 5.47                              |            |            |           |           |
| Res. time                                 |           | 7.06/3120 | 5.98/1280 | 19.9/5820 | 18.3/2920                         |            |            |           |           |

MD simulation results on K<sup>+</sup>/Na<sup>+</sup> – Ow coordination number and residence time:

Data for comparison: Ref. (9); MD simulation data for simple salt solution at infinite dilution (water model, SPC/E, Ref. (6), Na<sup>+</sup>, K<sup>+</sup>, Ref. (3)): K<sup>+</sup> - Ow occupancy 7.1, RT<sub>av</sub> = 14.3 ps; Na<sup>+</sup> - Ow occupancy 5.8, RT<sub>av</sub> = 22.4 ps. (In the cited work, values of RT<sub>av</sub> were calculated assuming 2 ps delay time; delay time used in the present work was 1 ps).

**Table 3S.** Occupancies and average and longest (in parentheses) residence times (in ps) of K<sup>+</sup>/Na<sup>+</sup> and water (Ow) near electronegative sites of the DNA bases.

**T02**

| DNA site             | K <sup>+</sup> or Na <sup>+</sup> |             |             |             | Ow          |            |             |             |
|----------------------|-----------------------------------|-------------|-------------|-------------|-------------|------------|-------------|-------------|
|                      | K/15                              | K/20        | Na/15       | Na/20       | K/15        | K/20       | Na/15       | Na/20       |
| <b>T2</b> Occupancy  | 0.65                              | 0.39        | 0.10        | 0.14        | 0.90        | 1.13       | 1.57        | 1.60        |
| Res. time            | 11.2 (1566)                       | 11.5 (804)  | 23.7 (942)  | 26.0 (1806) | 3.45 (444)  | 3.59 (348) | 5.18 (1188) | 5.13 (1224) |
| <b>T7</b> Occupancy  | 0.50                              | 0.34        | 0.23        | 0.13        | 0.84        | 1.02       | 1.67        | 1.49        |
| Res. time            | 31.5 (2532)                       | 20.9 (1074) | 92.0 (3180) | 29.4 (1434) | 3.08 (288)  | 3.59 (498) | 4.98 (2046) | 4.99 (1086) |
| <b>T11</b> Occupancy | 0.48                              | 0.31        | 0.05        | 0.04        | 0.78        | 0.99       | 1.37        | 1.35        |
| Res. time            | 31.6 (2130)                       | 28.7 (1278) | 17.0 (1182) | 17.4 (1074) | 3.05 (942)  | 3.23 (330) | 5.31 (1428) | 4.71 (846)  |
| <b>T15</b> Occupancy | 0.40                              | 0.18        | 0.06        | 0.20        | 0.90        | 1.16       | 1.41        | 1.37        |
| Res. time            | 22.6 (2502)                       | 20.6 (852)  | 26.4 (816)  | 36.5 (2496) | 3.54 (720)  | 4.12 (390) | 5.74 (870)  | 5.15 (972)  |
| <b>T19</b> Occupancy | 0.33                              | 0.33        | 0.12        | 0.18        | 1.17        | 1.19       | 1.81        | 1.46        |
| Res. time            | 10.0 (1788)                       | 11.6 (960)  | 15.9 (1146) | 22.9 (1806) | 4.46 (1098) | 4.28 (396) | 5.16 (918)  | 4.66 (600)  |



**CO2**

| DNA site             | K <sup>+</sup> or Na <sup>+</sup> |            |            |            | Ow        |            |            |            |
|----------------------|-----------------------------------|------------|------------|------------|-----------|------------|------------|------------|
|                      | K/15                              | K/20       | Na/15      | Na/20      | K/15      | K/20       | Na/15      | Na/20      |
| <b>C4</b> Occupancy  | 0.08                              | 0.06       | 0.00       | 0.01       | 0.94      | 0.98       | 0.92       | 1.09       |
| Res.time             | 10.80(474)                        | 8.79(252)  | 5.68(78)   | 6.78(96)   | 5.14(348) | 5.22(414)  | 5.82(1476) | 6.36(1572) |
| <b>C8</b> Occupancy  | 0.38                              | 0.32       | 0.09       | 0.07       | 0.97      | 0.98       | 1.37       | 1.55       |
| Res.time             | 8.87(942)                         | 9.60(1440) | 7.34(702)  | 9.27(750)  | 4.56(480) | 3.89(246)  | 6.87(4734) | 6.90(2010) |
| <b>C14</b> Occupancy | 0.21                              | 0.18       | 0.03       | 0.09       | 1.17      | 1.17       | 1.33       | 1.23       |
| Res.time             | 7.29(1998)                        | 8.90(810)  | 14.33(570) | 25.71(990) | 6.65(360) | 5.74(402)  | 6.11(1974) | 6.55(1284) |
| <b>C17</b> Occupancy | 0.10                              | 0.09       | 0.03       | 0.01       | 0.95      | 1.01       | 0.96       | 1.07       |
| Res.time             | 22.67(678)                        | 16.49(516) | 19.17(768) | 4.55(72)   | 5.35(318) | 5.24(318)  | 5.94(624)  | 6.40(678)  |
| <b>C20</b> Occupancy | 0.31                              | 0.20       | 0.02       | 0.04       | 1.02      | 1.28       | 1.48       | 1.28       |
| Res.time             | 7.38(744)                         | 6.65(474)  | 14.10(294) | 8.26(210)  | 4.36(468) | 5.01(1380) | 6.94(3966) | 6.27(1056) |

**AN3**

| DNA site             | K <sup>+</sup> or Na <sup>+</sup> |             |            |             | Ow         |            |             |             |
|----------------------|-----------------------------------|-------------|------------|-------------|------------|------------|-------------|-------------|
|                      | K/15                              | K/20        | Na/15      | Na/20       | K/15       | K/20       | Na/15       | Na/20       |
| <b>A1</b> Occupancy  | 0.41                              | 0.21        | 0.02       | 0.04        | 0.73       | 0.97       | 1.11        | 1.13        |
| Res.time             | 43.8 (4194)                       | 30.5 (1884) | 27.7 (468) | 25.0 (564)  | 6.04 (774) | 6.61 (678) | 9.60 (5196) | 8.19 (2628) |
| <b>A5</b> Occupancy  | 0.21                              | 0.19        | 0.06       | 0.01        | 0.88       | 0.88       | 1.01        | 1.05        |
| Res.time             | 26.5 (1242)                       | 30.9 (750)  | 28.0 (696) | 19.3 (402)  | 5.82 (564) | 6.07 (534) | 8.96 (2484) | 9.74 (1428) |
| <b>A9</b> Occupancy  | 0.16                              | 0.26        | 0.05       | 0.12        | 1.18       | 0.97       | 1.15        | 0.97        |
| Res.time             | 12.8 (816)                        | 20.4 (1338) | 8.12 (576) | 32.9 (1896) | 5.03 (834) | 4.63 (606) | 7.26 (3528) | 7.37 (1368) |
| <b>A13</b> Occupancy | 0.54                              | 0.14        | 0.01       | 0.06        | 0.62       | 1.02       | 1.11        | 1.08        |
| Res.time             | 59.0 (1920)                       | 16.6 (1434) | 5.78 (228) | 20.7 (1380) | 3.67 (486) | 6.01 (606) | 8.16 (4416) | 7.43 (2448) |
| <b>A18</b> Occupancy | 0.20                              | 0.20        | 0.01       | 0.06        | 0.96       | 0.93       | 1.10        | 1.12        |
| Res.time             | 29.1 (1254)                       | 32.8 (1038) | 29.5 (408) | 37.2 (870)  | 6.75 (660) | 7.21 (660) | 10.4 (2022) | 9.39 (3396) |

**GN3**

| DNA site             | K <sup>+</sup> or Na <sup>+</sup> |            |             |             | Ow         |             |             |             |
|----------------------|-----------------------------------|------------|-------------|-------------|------------|-------------|-------------|-------------|
|                      | K/15                              | K/20       | Na/15       | Na/20       | K/15       | K/20        | Na/15       | Na/20       |
| <b>G3</b> Occupancy  | 0.12                              | 0.09       | 0.01        | 0.01        | 1.04       | 1.12        | 1.23        | 1.20        |
| Res.time             | 10.4 (1152)                       | 6.91 (426) | 16.5 (288)  | 10.4 (168)  | 7.52 (858) | 7.08 (516)  | 8.30 (1512) | 7.51 (1500) |
| <b>G6</b> Occupancy  | 0.15                              | 0.10       | 0.02        | 0.02        | 1.03       | 1.08        | 1.26        | 1.26        |
| Res.time             | 10.9 (1770)                       | 9.93 (372) | 22.3 (360)  | 34.1 (774)  | 8.34 (696) | 8.55 (582)  | 8.42 (2994) | 10.4 (1926) |
| <b>G10</b> Occupancy | 0.07                              | 0.16       | 0.06        | 0.04        | 1.09       | 0.95        | 1.14        | 1.08        |
| Res.time             | 12.5 (870)                        | 14.3 (600) | 63.9 (2160) | 21.5 (1356) | 6.58 (780) | 6.56 (984)  | 5.98 (1536) | 8.18 (1170) |
| <b>G12</b> Occupancy | 0.30                              | 0.10       | 0.01        | 0.02        | 0.83       | 1.05        | 1.07        | 1.15        |
| Res.time             | 16.0 (924)                        | 10.3 (444) | 9.25 (84)   | 13.7 (222)  | 6.20 (732) | 6.02 (1188) | 7.51 (1710) | 6.74 (768)  |
| <b>G16</b> Occupancy | 0.11                              | 0.11       | 0.07        | 0.05        | 1.23       | 1.12        | 1.13        | 1.17        |
| Res.time             | 7.10 (504)                        | 8.06 (738) | 43.8 (1458) | 25.9 (726)  | 6.82 (810) | 6.63 (582)  | 7.76 (1740) | 7.69 (852)  |

**GN7**

| DNA site             | K <sup>+</sup> or Na <sup>+</sup> |             |             |             | Ow         |            |            |            |
|----------------------|-----------------------------------|-------------|-------------|-------------|------------|------------|------------|------------|
|                      | K/15                              | K/20        | Na/15       | Na/20       | K/15       | K/20       | Na/15      | Na/20      |
| <b>G3</b> Occupancy  | 0.06                              | 0.06        | 0.00        | 0.03        | 1.16       | 1.13       | 1.19       | 1.23       |
| Res.time             | 14.2 (300)                        | 18.5 (792)  | 8.70 (24)   | 23.0 (618)  | 4.72 (456) | 4.78 (444) | 5.53 (840) | 4.96 (546) |
| <b>G6</b> Occupancy  | 0.46                              | 0.41        | 0.15        | 0.05        | 0.99       | 0.97       | 1.30       | 1.38       |
| Res.time             | 20.9 (1014)                       | 22.8 (636)  | 29.8 (1212) | 15.1 (486)  | 3.64 (276) | 3.78 (384) | 5.50 (738) | 5.43 (378) |
| <b>G10</b> Occupancy | 0.61                              | 0.56        | 0.08        | 0.17        | 0.61       | 0.80       | 1.16       | 1.21       |
| Res.time             | 48.4 (1998)                       | 45.2 (1398) | 24.6 (708)  | 23.3 (1200) | 2.64 (216) | 2.46 (156) | 4.08 (330) | 3.69 (234) |
| <b>G12</b> Occupancy | 0.21                              | 0.15        | 0.03        | 0.02        | 1.33       | 1.28       | 1.40       | 1.41       |
| Res.time             | 20.5 (618)                        | 23.6 (402)  | 16.6 (204)  | 10.4 (510)  | 3.36 (264) | 3.45 (222) | 4.29 (534) | 4.32 (576) |
| <b>G16</b> Occupancy | 0.08                              | 0.06        | 0.02        | 0.03        | 1.15       | 1.14       | 1.22       | 1.23       |
| Res.time             | 14.1 (294)                        | 15.2 (342)  | 26.0 (420)  | 33.6 (936)  | 4.63 (696) | 4.87 (324) | 5.20 (456) | 5.35 (498) |

**G06**

| DNA site             | K <sup>+</sup> or Na <sup>+</sup> |             |            |            | Ow         |            |            |             |
|----------------------|-----------------------------------|-------------|------------|------------|------------|------------|------------|-------------|
|                      | K/15                              | K/20        | Na/15      | Na/20      | K/15       | K/20       | Na/15      | Na/20       |
| <b>G3</b> Occupancy  | 0.12                              | 0.11        | 0.00       | 0.02       | 1.60       | 1.46       | 1.38       | 1.66        |
| Res.time             | 20.5 (786)                        | 14.9 (456)  | 7.46 (144) | 9.15 (216) | 6.01 (414) | 5.71 (294) | 5.80 (402) | 6.42 (636)  |
| <b>G6</b> Occupancy  | 0.51                              | 0.45        | 0.17       | 0.10       | 0.58       | 0.73       | 1.34       | 1.43        |
| Res.time             | 37.6 (1326)                       | 40.8 (1296) | 18.6 (654) | 23.0 (528) | 2.82 (180) | 2.68 (150) | 4.87 (816) | 4.66 (1092) |
| <b>G10</b> Occupancy | 0.61                              | 0.57        | 0.05       | 0.12       | 0.54       | 0.58       | 1.36       | 1.60        |
| Res.time             | 105 (2946)                        | 89.5 (2856) | 12.5 (342) | 10.8 (588) | 2.58 (150) | 2.66 (108) | 5.37 (696) | 5.38 (456)  |
| <b>G12</b> Occupancy | 0.12                              | 0.10        | 0.01       | 0.01       | 1.18       | 1.05       | 1.32       | 1.29        |
| Res.time             | 11.7 (774)                        | 15.1 (732)  | 7.09 (96)  | 14.4 (168) | 5.38 (252) | 5.48 (270) | 5.84 (444) | 5.84 (540)  |
| <b>G16</b> Occupancy | 0.11                              | 0.11        | 0.01       | 0.01       | 1.36       | 1.43       | 1.71       | 1.51        |
| Res.time             | 14.2 (414)                        | 13.8 (414)  | 14.5 (138) | 5.64 (132) | 5.64 (306) | 5.68 (360) | 5.95 (498) | 5.83 (768)  |

## AN7

| DNA site             | K <sup>+</sup> or Na <sup>+</sup> |             |             |             | Ow         |            |            |            |
|----------------------|-----------------------------------|-------------|-------------|-------------|------------|------------|------------|------------|
|                      | K/15                              | K/20        | Na/15       | Na/20       | K/15       | K/20       | Na/15      | Na/20      |
| <b>A1</b> Occupancy  | 0.02                              | 0.03        | 0.06        | 0.01        | 1.10       | 1.05       | 1.11       | 1.10       |
| Res.time             | 20.4 (318)                        | 26.5 (330)  | 107 (654)   | 84.3 (558)  | 6.21 (372) | 6.82 (480) | 6.67 (672) | 6.83 (426) |
| <b>A5</b> Occupancy  | 0.46                              | 0.36        | 0.21        | 0.15        | 0.88       | 0.92       | 1.18       | 1.19       |
| Res.time             | 22.3 (780)                        | 16.9 (900)  | 29.4 (2406) | 45.9 (1242) | 3.48 (234) | 3.58 (252) | 3.83 (852) | 3.90 (372) |
| <b>A9</b> Occupancy  | 0.57                              | 0.49        | 0.13        | 0.22        | 0.77       | 0.84       | 1.19       | 0.93       |
| Res.time             | 23.4 (2058)                       | 15.9 (972)  | 50.7 (2010) | 35.6 (936)  | 2.90 (240) | 3.19 (234) | 3.47 (540) | 3.66 (228) |
| <b>A13</b> Occupancy | 0.01                              | n.a.        | 0.03        | 0.05        | 1.13       | 1.13       | 1.04       | 1.05       |
| Res.time             | 26.0 (282)                        | n.a.        | 129 (1500)  | 101 (1452)  | 4.94 (438) | 5.04 (402) | 6.95 (570) | 6.25 (618) |
| <b>A18</b> Occupancy | 0.03                              | 0.07        | 0.03        | 0.02        | 1.07       | 1.01       | 1.07       | 1.09       |
| Res.time             | 22.9 (486)                        | 55.4 (1080) | 109 (1368)  | 71.0 (492)  | 7.27 (444) | 6.81 (438) | 8.35 (546) | 6.78 (516) |

**T04**

| DNA site             | K <sup>+</sup> or Na <sup>+</sup> |             |            |            | Ow         |            |            |            |
|----------------------|-----------------------------------|-------------|------------|------------|------------|------------|------------|------------|
|                      | K/15                              | K/20        | Na/15      | Na/20      | K/15       | K/20       | Na/15      | Na/20      |
| <b>T2</b> Occupancy  | 0.03                              | 0.05        | 0.01       | 0.01       | 1.06       | 1.25       | 1.25       | 1.28       |
| Res.time             | 5.24 (126)                        | 5.70 (168)  | 4.65 (60)  | 6.31 (198) | 3.38 (162) | 3.43 (150) | 3.76 (414) | 3.81 (264) |
| <b>T7</b> Occupancy  | 0.24                              | 0.27        | 0.06       | 0.03       | 1.55       | 1.66       | 1.87       | 1.88       |
| Res.time             | 7.66 (300)                        | 8.88 (240)  | 8.97 (870) | 6.44 (258) | 5.33 (240) | 5.31 (342) | 5.70 (774) | 5.70 (552) |
| <b>T11</b> Occupancy | 0.00                              | 0.00        | n.a.       | 0.00       | 0.61       | 0.78       | 0.94       | 0.96       |
| Res.time             | 4.00 (156)                        | 1.84 (30)   | n.a.       | 8.50 (138) | 3.28 (156) | 3.16 (144) | 3.39 (288) | 3.35 (306) |
| <b>T15</b> Occupancy | 0.00                              | 0.01        | 0.00       | n.a.       | 0.87       | 0.85       | 1.01       | 0.95       |
| Res.time             | 1.59 (42)                         | 2.49 (72)   | 6.93 (84)  | n.a.       | 3.85 (174) | 4.22 (240) | 4.53 (372) | 4.15 (288) |
| <b>T19</b> Occupancy | 0.47                              | 0.48        | 0.01       | 0.02       | 1.03       | 0.98       | 1.93       | 1.58       |
| Res.time             | 12.4 (1008)                       | 13.7 (1110) | 3.88 (90)  | 4.89 (132) | 3.52 (168) | 3.11 (222) | 5.09 (528) | 4.50 (582) |

## References

1. Korolev, N., Lyubartsev, A.P., Laaksonen, A. and Nordenskiöld, L. (2003) A molecular dynamics simulation study of oriented DNA with polyamine and sodium counterions: diffusion and averaged binding of water and cations. *Nucleic Acids Res.*, **31**, 5971-5981.
2. Toukan, K. and Rahman, A. (1985) Molecular-dynamics study of atomic motions in water. *Phys.Rev.B*, **31**, 2643-2648.
3. Smith, D.E. and Dang, L.X. (1994) Computer-simulations of NaCl association in polarizable water. *J.Chem.Phys.*, **100**, 3757-3766.
4. Harned, H.S. and Robinson, R.A. (1968) *The International Encyclopedia of Physical Chemistry and Chemical Physics*. Pergamon Press, Oxford.
5. Mark, P. and Nilsson, L. (2001) Structure and dynamics of the TIP3P, SPC, and SPC/E water models at 298 K. *J.Phys.Chem.A*, **105**, 9954-9960.
6. Berendsen, H.J.C., Grigera, J.R. and Straatsma, T.P. (1987) The missing term in effective pair potentials. *J.Phys.Chem.*, **91**, 6269-6271.
7. Jorgensen, W.L., Chandrasekhar, J., Madura, J.D., Impey, R.W. and Klein, M.L. (1987) Comparison of simple potential functions for simulating liquid water. *J.Chem.Phys.*, **79**, 926-935.
8. Neria, E., Fischer, S. and Karplus, M. (1996) Simulation of activation free energies in molecular systems. *J.Chem.Phys.*, **105**, 1902-1921.
9. Koneshan, S., Rasaiah, J.C., Lynden-Bell, R.M. and Lee, S.H. (1998) Solvent structure, dynamics, and ion mobility in aqueous solutions at 25° C. *J.Phys.Chem.B*, **102**, 4193-4204.
10. Varnai, P. and Zakrzewska, K. (2004) DNA and its counterions: a molecular dynamics study. *Nucleic Acids Res.*, **32**, 4269-4280.
11. Aqvist, J. (1990) Ion-water interaction potentials derived from free energy perturbation simulations. *J.Phys.Chem.*, **94**, 8021-8024.
12. Ponomarev, S.Y., Thayer, K.M. and Beveridge, D.L. (2004) Ion motion in molecular dynamics simulations on DNA. *Proc.Natl.Acad.Sci.U.S.A.*, **101**, 14771-14775.
13. Stofer, E. and Lavery, R. (1994) Measuring the geometry of DNA grooves. *Biopolymers*, **34**, 337-346.
14. Korolev, N., Lyubartsev, A.P., Laaksonen, A. and Nordenskiöld, L. (2004) A molecular dynamics simulation study of polyamine- and sodium-DNA. Interplay between polyamine binding and DNA structure. *Eur.Biophys.J.*, **33**, 671-682.
